# Supplementary material for: New complete genome sequences of human rhinoviruses shed light on their phylogeny and genomic features
Source: PubMed Central journal article supplement (PMC1949831; doi:10.1186/1471-2164-8-224), 2007-07-10

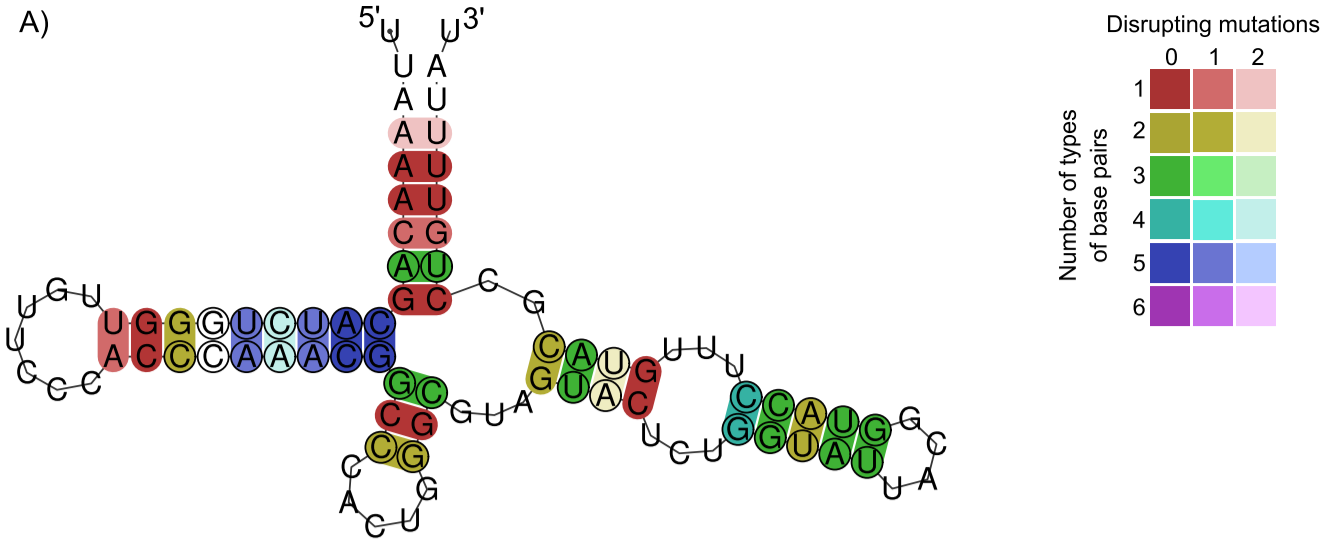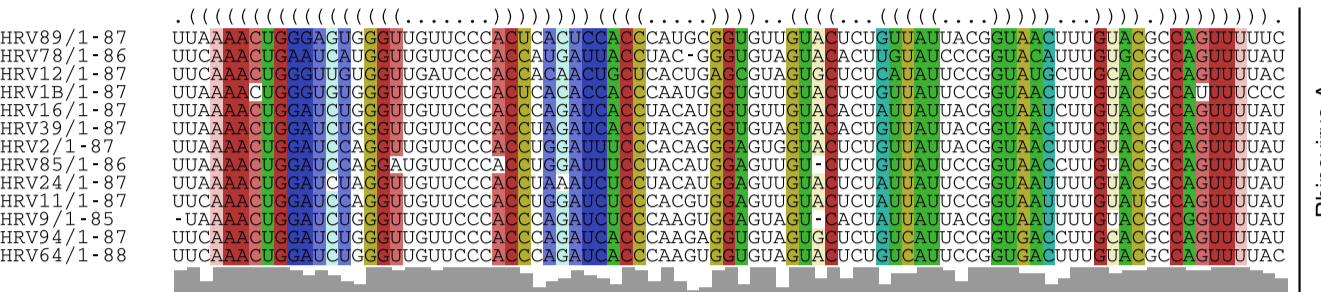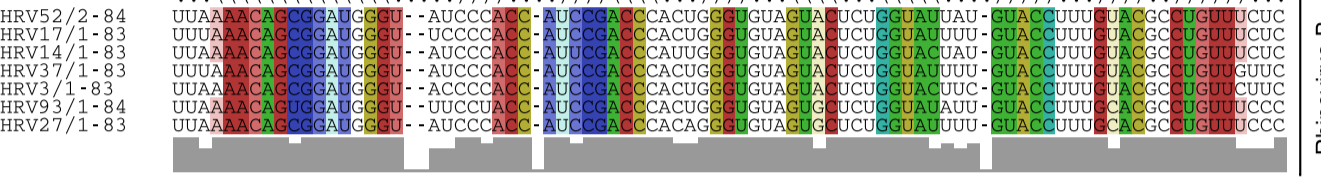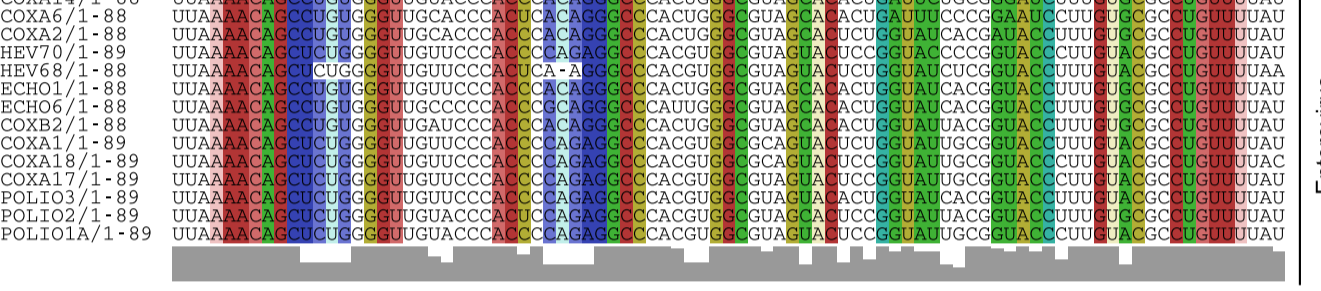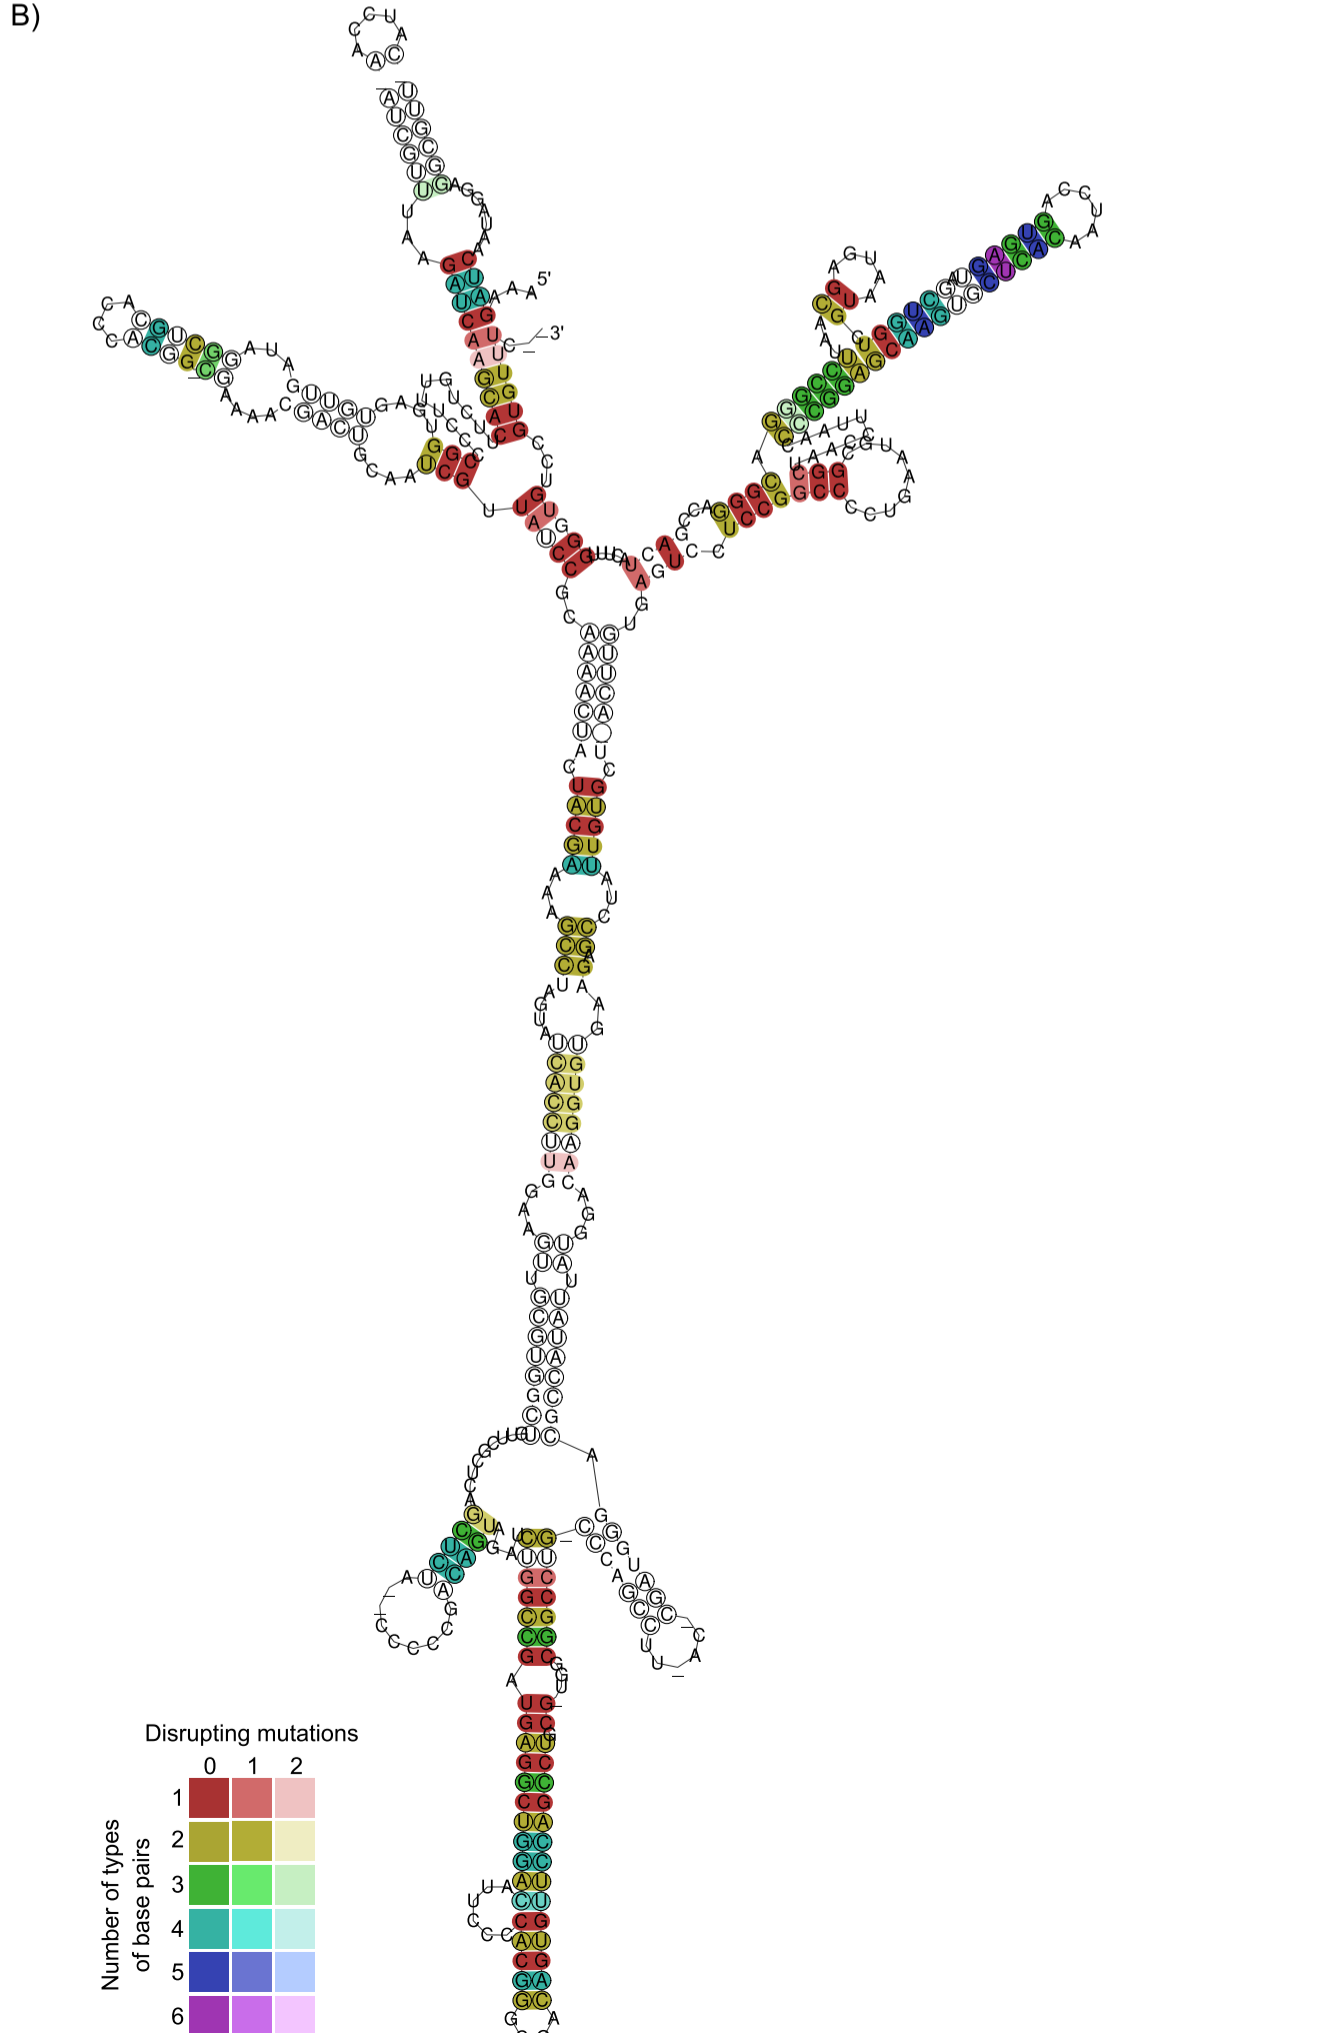

Supplement: 1471-2164-8-224-S3.pdf [file 1471-2164-8-224-S3.pdf]
